# Supplementary material for: Micronutrients in Multiple Pregnancies—The Knowns and Unknowns: A Systematic Review
Source: MDPI journal article supplement (doi:10.3390/nu13020386), 2021-01-27
Supplement: s1 [file s1]

**Table S1****Risk of bias assessment**

Note: This is AXIS tool developed for a critical assessment of the quality of cross-sectional studies [1]

Possible answers: Yes / No / Do not know/comment

The assessment refers to the population of women with multiple pregnancies included in each study.

|                                                                                                                                                      | Ball & Giles<br>1964 | Scott &<br>Somerville | Reddy et al.<br>1983 | Okah et al.<br>1996 | Bajoria et al.<br>2001 | Nakayama et al.<br>2011 | de la Calle et al.<br>2016 | Goswami et al.<br>2016 | Ru et al.<br>2016 | Shinar et al.<br>2018 | Blarduni et al.<br>2019 | Delaney et al.<br>2020 | Jantsch et al.<br>2020 |
|------------------------------------------------------------------------------------------------------------------------------------------------------|----------------------|-----------------------|----------------------|---------------------|------------------------|-------------------------|----------------------------|------------------------|-------------------|-----------------------|-------------------------|------------------------|------------------------|
| <b>Introduction</b>                                                                                                                                  |                      |                       |                      |                     |                        |                         |                            |                        |                   |                       |                         |                        |                        |
| 1. Were the aims/objectives of the study clear?                                                                                                      | No                   | No                    | Yes                  | Yes                 | Yes                    | Yes                     | Yes                        | Yes                    | Yes               | Yes                   | Yes                     | Yes                    | Yes                    |
| <b>Methods</b>                                                                                                                                       |                      |                       |                      |                     |                        |                         |                            |                        |                   |                       |                         |                        |                        |
| 2 Was the study design appropriate for the stated aim(s)?                                                                                            | Yes                  | Yes                   | Yes                  | Yes                 | Yes                    | Yes                     | Yes                        | Yes                    | Yes               | Yes                   | Yes                     | Yes                    | Yes                    |
| 3 Was the sample size justified?                                                                                                                     | No                   | No                    | No                   | Yes                 | No                     | No                      | No                         | No                     | Yes               | No                    | No                      | No                     | No                     |
| 4 Was the target/reference population clearly defined? (Is it clear who the research was about?)                                                     | Yes                  | Yes                   | Yes                  | Yes                 | Yes                    | Yes                     | Yes                        | Yes                    | Yes               | Yes                   | Yes                     | Yes                    | Yes                    |
| 5 Was the sample frame taken from an appropriate population base so that it closely represented the target/reference population under investigation? | Yes                  | Yes                   | Yes                  | Yes                 | Yes                    | Yes                     | Yes                        | Yes                    | Yes               | Yes                   | Yes                     | Yes                    | Yes                    |
| 6 Was the selection process likely to select subjects/participants that were representative of the target/reference population under investigation?  | Yes                  | Yes                   | Yes                  | Yes                 | Yes                    | Yes                     | Yes                        | Yes                    | Yes               | Yes                   | Yes                     | Yes                    | Yes                    |
| 7 Were measures undertaken to address and categorize non-responders?                                                                                 | No                   | No                    | No                   | No                  | No                     | Yes                     | No                         | Yes                    | Yes               | No                    | Yes                     | No                     | No                     |

|                                                                                                                                                          |      |      |      |      |      |      |     |     |     |     |     |     |     |
|----------------------------------------------------------------------------------------------------------------------------------------------------------|------|------|------|------|------|------|-----|-----|-----|-----|-----|-----|-----|
| 8 Were the risk factor and outcome variables measured appropriate to the aims of the study?                                                              | Yes  | Yes  | Yes  | Yes  | Yes  | Yes  | Yes | Yes | Yes | Yes | Yes | Yes | Yes |
| 9 Were the risk factor and outcome variables measured correctly using instruments/ measurements that had been trialled, piloted or published previously? | Yes  | Yes  | Yes  | Yes  | Yes  | Yes  | Yes | Yes | Yes | Yes | Yes | Yes | Yes |
| 10 Is it clear what was used to determined statistical significance and/or precision estimates? (e.g., p values, CIs)                                    | Yes  | No   | Yes  | Yes  | Yes  | Yes  | Yes | Yes | Yes | Yes | Yes | Yes | Yes |
| 11 Were the methods (including statistical methods) sufficiently described to enable them to be repeated?                                                | Yes  | No   | Yes  | Yes  | Yes  | Yes  | No  | Yes | Yes | Yes | Yes | Yes | Yes |
| Results                                                                                                                                                  |      |      |      |      |      |      |     |     |     |     |     |     |     |
| 12 Were the basic data adequately described?                                                                                                             | No   | No   | Yes  | Yes  | Yes  | Yes  | Yes | Yes | Yes | Yes | Yes | Yes | Yes |
| 13 Does the response rate raise concerns about non-response bias?                                                                                        | ND   | ND   | ND   | ND   | ND   | No   | ND  | No  | No  | ND  | No  | ND  | ND  |
| 14 If appropriate, was information about non-responders described?                                                                                       | No   | No   | No   | No   | No   | Yes  | No  | Yes | Yes | No  | Yes | No  | No  |
| 15 Were the results internally consistent?                                                                                                               | Yes  | Yes  | Yes  | Yes  | Yes  | Yes  | Yes | Yes | Yes | Yes | Yes | Yes | Yes |
| 16 Were the results for the analyses described in the methods, presented?                                                                                | Yes  | ND   | Yes  | Yes  | Yes  | Yes  | Yes | Yes | Yes | Yes | Yes | Yes | Yes |
| Discussion                                                                                                                                               |      |      |      |      |      |      |     |     |     |     |     |     |     |
| 17 Were the authors' discussions and conclusions justified by the results?                                                                               | Yes  | Yes  | Yes  | Yes  | Yes  | Yes  | Yes | Yes | Yes | Yes | Yes | Yes | Yes |
| 18 Were the limitations of the study discussed?                                                                                                          | No   | No   | No   | No   | No   | Yes  | No  | No  | Yes | Yes | No  | Yes | No  |
| Others                                                                                                                                                   |      |      |      |      |      |      |     |     |     |     |     |     |     |
| 19 Were there any funding sources or conflicts of interest that may affect the authors' interpretation of the results?                                   | NDis | NDis | NDis | NDis | NDis | NDis | No  | No  | No  | No  | No  | No  | No  |

|                                                              |    |    |    |     |     |     |     |     |     |     |     |     |     |
|--------------------------------------------------------------|----|----|----|-----|-----|-----|-----|-----|-----|-----|-----|-----|-----|
| 20 Was ethical approval or consent of participants attained? | NS | NS | NS | Yes | Yes | Yes | Yes | Yes | Yes | Yes | Yes | Yes | Yes |
|--------------------------------------------------------------|----|----|----|-----|-----|-----|-----|-----|-----|-----|-----|-----|-----|

Abbreviations: ND – not described; NDis – not disclosed; NS – not stated

- Downes, M.J.; Brennan, M.L.; Williams, H.C.; Dean, R.S. Development of a critical appraisal tool to assess the quality of cross-sectional studies (AXIS). *BMJ Open* 2016, 6, e011458, doi:10.1136/bmjopen-2016-011458.
